# Supplementary material
Source: Springer Nature journal article supplement (https://www.springermedizin.de/resource/supplementary/12889_2009_2266_MOESM7_ESM.pdf/9485198)
Supplement: MOESM7 [file 9485198]

Estimated fraction of new cases that have MDR ( $\hat{A}$ )

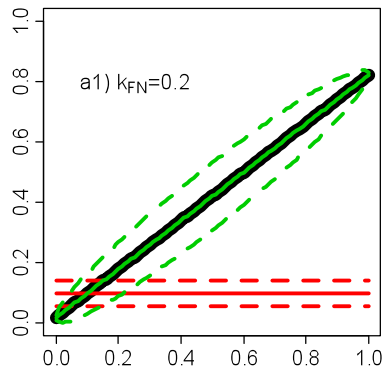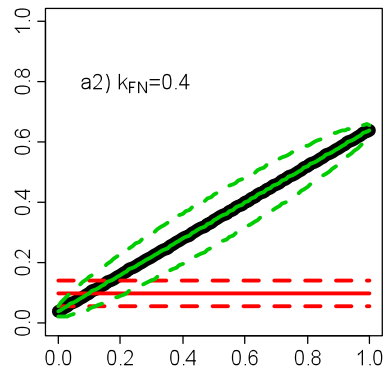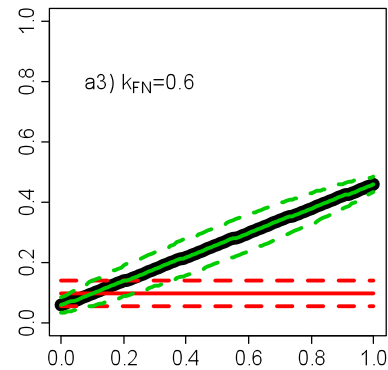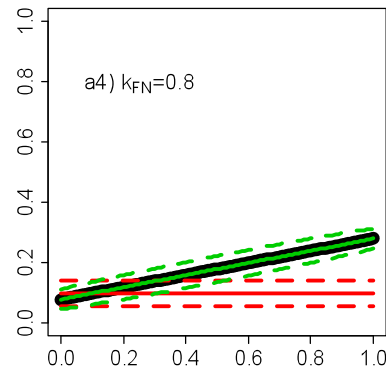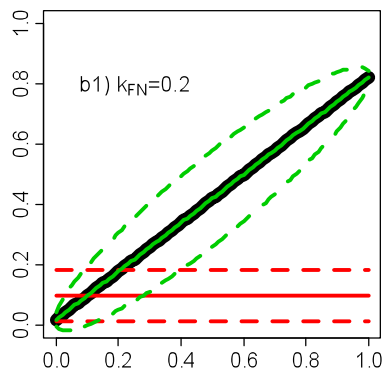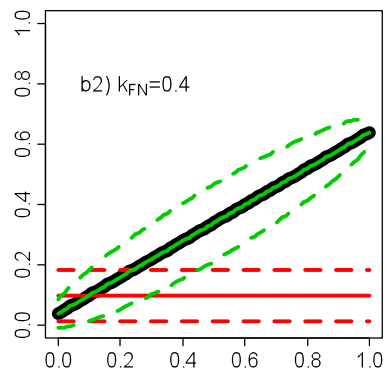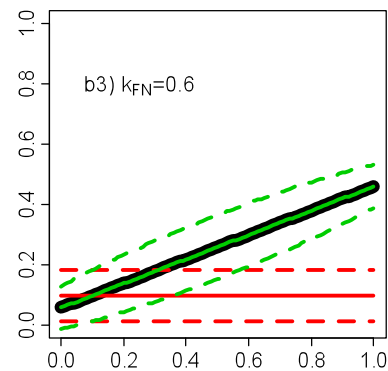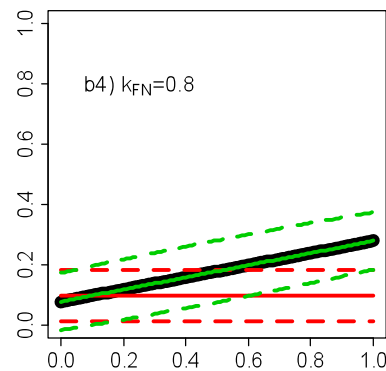

Fraction of new cases in private sector that have MDR ( $A_p$ )
